# Supplementary material
Source: PubMed Central journal article supplement (PMC6382079)
Supplement: NIHMS1515260-supplement-7.pdf [file NIHMS1515260-supplement-7.pdf]

**Data File S1: Sequencing data for *rpl* and *rps* mutants, Related to Figures 1-3.**

Ribosome profiling data in RPKM (reads per kilobase million) are in columns B-Z, total RNA-seq data in RPKM are in columns AA-AY, TE (translation efficiency) values are in columns AZ-BX. Strains are sorted by growth rate, as presented in Figures 1-3. For TE, values were determined by calculating the ratio of ribosome footprint to mRNA-seq RPKM values. If total reads for mRNA and fps <48, a value of “ND” is shown.

**Data File S2: mRNA synthesis for *rpl* and *rps* mutants, Related to Figure 3.**

Data shown are for slope as determined by thioU incorporation measurements over time (0 hr to 15 min), as described in (Chan et al., 2018).

**Data File S3: Mass spectrometry of 80S/monosome peak from *rpl* and *rps* mutants,**

**Related to Figure S2.** TMT protein data quantification are shown, with mutants sorted by growth. Columns E to X represent data normalized to master mix to allow comparison of levels among all samples.

**Data File S4: Mass spectrometry of extract from *rpl* and *rps* mutants, Related to Figure 4.**

Matched extract to that used for File S1 was subjected to TMT-based mass spectrometry. Mutants are sorted by growth. Columns F to X represent data normalized to master mix to allow comparison of levels among all samples.

**Data File S5: Mass spectrometry of 60S peak from *rpl* and *rps* mutants, Related to Figure 5.**

TMT protein data are shown, with mutants sorted by growth. Values are normalized to total intensity.
